# Supplementary material for: Model for End-Stage Liver Disease and Sodium Velocity Predicts Overall Survival in Nonmetastatic Hepatocellular Carcinoma Patients
Source: Hindawi journal article supplement (doi:10.1155/2018/5681979), 2018-11-07
Supplement: f1 [file 5681979.f1.pdf]

| Cause of Death                      | MELD-Na Increase from Baseline |            |
|-------------------------------------|--------------------------------|------------|
|                                     | <40%, n=131                    | ≥40%, n=51 |
| Progression of Liver Disease, n (%) | 15 (11)                        | 13 (25)    |
| Cancer Related Deaths, n (%)        | 43 (33)                        | 27 (53)    |

Supplementary Table 1. Cause of death grouped by MELD-Na increase cutoff of 40%.
